# Supplementary material for: Density functional theory study on the adsorption and decomposition of the formic acid catalyzed by highly active mushroom-like Au@Pd@Pt tri-metallic nanoparticles
Source: Royal Society of Chemistry journal article supplement (doi:10.1039/c3cp44053b), 2013-01-01
Supplement: c3cp44053b.pdf [file c3cp44053b.pdf]

# Supporting information for: Density Functional Theory Study on the Adsorption and Decomposition of the Formic Acid Catalyzed by Highly Active Mushroom-like Au@Pd@Pt Tri-Metallic Nanoparticles<sup>†</sup>

Sai Duan,<sup>a,b</sup> Yong-Fei Ji,<sup>b</sup> Ping-Ping Fang,<sup>a</sup> Yan-Xia Chen,<sup>c</sup> Xin Xu,<sup>d</sup> Yi Luo<sup>\*b,c</sup> and Zhong-Qun Tian<sup>\*a</sup>

## 1 Adsorption of O and OH on the top site in the edge area

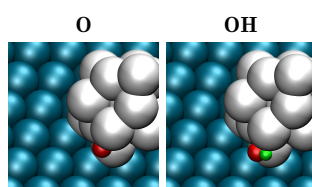

**Fig. S1** Optimized structures for O and OH adsorbed on the top site in the edge area of Au@2 ML Pd@0.5 ML Pt NPs.

## 2 Adsorption of OH in the center area

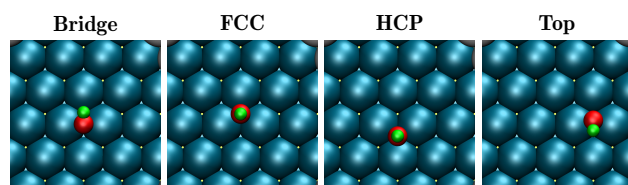

**Fig. S2** Optimized structures for OH adsorbed on the center area of Au@2 ML Pd@0.5 ML Pt NPs.

## 3 Adsorption of HCOO in the edge area

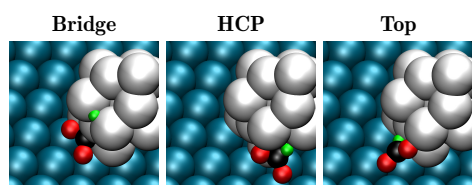

**Fig. S3** Optimized structures for HCOO adsorbed on the edge area with fixed adsorption sites of Au@2 ML Pd@0.5 ML Pt NPs.

## 4 Adsorption of HCOOH in the edge area

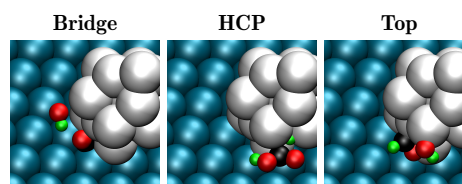

**Fig. S4** Optimized structures for HCOOH adsorbed on the edge area with fixed adsorption sites of Au@2 ML Pd@0.5 ML Pt NPs.

## 5 Adsorption of COOH<sub>u</sub> in the edge area

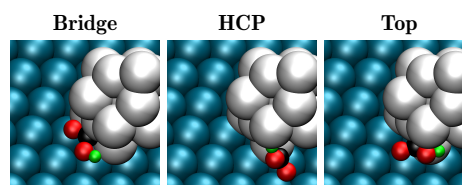

**Fig. S5** Optimized structures for COOH<sub>u</sub> adsorbed on the edge area with fixed adsorption sites of Au@2 ML Pd@0.5 ML Pt NPs.

## 6 Adsorption of COOH<sub>d</sub> in the edge area

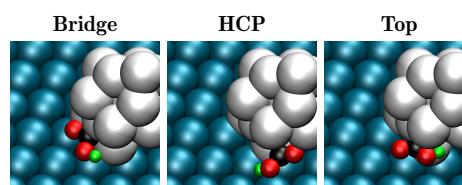

**Fig. S6** Optimized structures for COOH<sub>d</sub> adsorbed on the edge area with fixed adsorption sites of Au@2 ML Pd@0.5 ML Pt NPs.
